# Supplementary material
Source: HighWire-hosted journal article supplement (https://www.cmaj.ca/highwire/filestream/57622/field_highwire_adjunct_files/0/devel-straus-1-at.pdf)
Supplement: devel-straus-1-at.pdf [file devel-straus-1-at.pdf]

**Appendix 1 (as submitted by the authors):** KT interventions linked to targets, barriers for change and theory

| <i>Targets of the KT intervention</i>                     | <i>Theory and suggested barriers for change (examples)</i>                                     | <i>KT intervention approaches (examples)</i>                                                                   |
|-----------------------------------------------------------|------------------------------------------------------------------------------------------------|----------------------------------------------------------------------------------------------------------------|
| <b>1. Factors in health professionals</b>                 |                                                                                                |                                                                                                                |
| Learn about the new knowledge                             | Cognitive theory on learning : learning style, use of communication channels, domain knowledge | Use various information delivery methods; adapt to different learning styles; relate to pre-existing knowledge |
| Increase motivation for use of knowledge                  | Motivational theories: stages of change, goal setting                                          | Help to define individual goals for change; adapt activities to stage of change                                |
| Change beliefs about consequences of use of knowledge use | Social cognitive theory: outcome expectancies, attributions of behavior                        | Provide education and feedback on consequences; challenge beliefs on consequences of decisions and actions     |
| Influence individual assessment of the innovation         | Theory of planned behaviour, rational choice theory: attitudes, utilities, perceived risk      | Provide information on value attached to innovation; improve utility and reduce risk of innovation             |
| Influence the views of others regarding the new knowledge | Theories of planned behaviour, social comparison: perceived social norms                       | Involve opinion leaders or relevant others, like professional peers                                            |
| Change beliefs about individual capabilities              | Social cognitive theory: perceived behavioural control, self-efficacy, self-confidence         | Create opportunity to build up self-confidence; allow experimentation with the innovation                      |
| Influence emotions attached to the knowledge              | Theory on learning: satisfaction with performance, attractiveness of innovation                | Counselling to influence individual standards; improve attractiveness of the innovation                        |
| Influence behavioural                                     | Social cognitive theory: coping                                                                | Provide feedback and reminders to                                                                              |

| <i>Targets of the KT intervention</i>                                                                                    | <i>Theory and suggested barriers for change (examples)</i>                                                                   | <i>KT intervention approaches (examples)</i>                                                                          |
|--------------------------------------------------------------------------------------------------------------------------|------------------------------------------------------------------------------------------------------------------------------|-----------------------------------------------------------------------------------------------------------------------|
| regulation in users of knowledge                                                                                         | behavior, observational learning                                                                                             | enable self-regulation; adapt innovation to individual needs                                                          |
| Improve skills                                                                                                           | Cognitive theory on learning: demonstration, practising                                                                      | Provide skills training, feedback on performance                                                                      |
| <b>Factors in patient care teams and networks</b>                                                                        |                                                                                                                              |                                                                                                                       |
| Change structures and process in teams                                                                                   | Theory on team effectiveness, group decisions : group task orientation, group composition                                    | Change the composition of a team, provide training to change group processes                                          |
| Use leadership and key individuals                                                                                       | Theories on persuasion and leadership: change agents, opinion leaders                                                        | Identify and involve leaders and change agents to transfer information                                                |
| Change social network structures                                                                                         | Theory on diffusion of information: density, centralization                                                                  | Change structures for information exchange, change structures for collaboration                                       |
| <b>Factors in healthcare organizations</b>                                                                               |                                                                                                                              |                                                                                                                       |
| Change specification (prescription of specific practices) and flexibility (room for deviation from prescribed practices) | Theory on complex adaptive systems, organizational innovativeness: presence and content of clinical guidelines and protocols | Implement clinical protocols and decision support, redesign the care delivery process, use individual treatment plans |
| Influence leadership in an organisation                                                                                  | Theory on quality management: constancy of purpose, centralisation, management tenure                                        | Recruit and train to have specific types of leaders                                                                   |
| Influence specialisation and technical expertise in                                                                      | Theory on organizational innovativeness: differentiation,                                                                    | Change the mix of professional skills in the organisation, make better use of                                         |

| <i>Targets of the KT intervention</i>                                   | <i>Theory and suggested barriers for change (examples)</i>                                                                   | <i>KT intervention approaches (examples)</i>                                                  |
|-------------------------------------------------------------------------|------------------------------------------------------------------------------------------------------------------------------|-----------------------------------------------------------------------------------------------|
| an organisation                                                         | professionalism                                                                                                              | information technology                                                                        |
| Implement continuous improvement activities                             | Theories on quality management, process mindedness, concern for measurement                                                  | Create teams/collaboratives for improvement                                                   |
| Improve communication with actors outside the organisation              | Theory on quality management: customer mindedness, reactiviness                                                              | Undertake patient and supplier satisfaction activities, provide yearly quality reports        |
| Improve communication within an organisation                            | Theory on organisational learning, organisational culture : climate of openness, generative relationships, cooperation focus | Undertake care provider satisfaction activities;<br>Make better use of information technology |
| Change organisational size                                              | Theory on organizational innovativeness: learning curve, size of scale/scope advantage                                       | Change number of health professionals (input); change volume of services delivered (output)   |
| <b>Factors in the healthcare system</b>                                 |                                                                                                                              |                                                                                               |
| Enhance development of the health professions                           | Theory on professional development: systems for certification, continued education                                           | Enhance professional development in health professions                                        |
| Increase priority of KT issues on the societal agenda                   | Theory on agenda building: media influence, attention in health policy                                                       | Use media to influence decision makers, build public support                                  |
| Change financial incentives and risk sharing for providers and patients | Theory on financial reimbursement: provider utility function, switching costs related to change, risk aversion               | Change the provider reimbursement and patient co-payment, reimburse switching costs           |
| Change market mechanisms in the                                         | Theories on competition and innovation: competition intensity,                                                               | Change competition intensity, provide feedback on technical efficiency                        |

| <i>Targets of the KT intervention</i> | <i>Theory and suggested barriers for change (examples)</i> | <i>KT intervention approaches (examples)</i> |
|---------------------------------------|------------------------------------------------------------|----------------------------------------------|
| healthcare system                     | transparency on services,<br>production efficiency         |                                              |
